# Supplementary material for: Essential Oils with High Activity against Stationary Phase Bartonella henselae
Source: PubMed Central journal article supplement (PMC6963529; doi:10.3390/antibiotics8040246), 2019-11-30
Supplement: antibiotics-08-00246-s001.pdf [file antibiotics-08-00246-s001.pdf]

**Table S1.** Chemical compositions of top hit essential oils against *B. henselae*.

| Essential oils           | Plant of essential oils        | Plant part         | Main chemical composition                                                                                                                                  | Reference |
|--------------------------|--------------------------------|--------------------|------------------------------------------------------------------------------------------------------------------------------------------------------------|-----------|
| Cinnamon bark            | <i>Cinnamomum zeylanicum</i>   | bark               | cinnamaldehyde, camphene, 1,8-cineole, $\alpha$ -terpineol, bornyl acetate, etc.                                                                           | [1]       |
| Oregano                  | <i>Origanum vulgare hirtum</i> | herbs              | thymol, $\gamma$ -terpinene, carvacrol, p-cymene, myrcene, etc.                                                                                            | [2]       |
| Elemi                    | <i>Canarium luzonicum</i>      | resin              | elemol, elemecin, sabinene, $\alpha$ -phellandrene, p-cymene, limonene, $\alpha$ -terpineol, etc.                                                          | [3]       |
| Mountain savory (winter) | <i>Satureja montana</i>        | herbs              | carvacrol, borneol, carvacrylacetate, $\alpha$ -terpineol, thymol, etc.                                                                                    | [4]       |
| Cedarwood                | <i>Cedrus deodora</i>          | wood               | wikstromol, matairesinol, benzylbutyrolactol, BDFD                                                                                                         | [5]       |
| Ylang ylang              | <i>Cananga odorata</i>         | flowers            | linalool, $\beta$ -caryophyllene, $\alpha$ -humulene, $\gamma$ -muurolene, germacrene D, (3E,6E)- $\alpha$ -farnesene, $\delta$ -cadinene, benzyl benzoate | [6]       |
| Citronella               | <i>Cymbopogon winterianus</i>  | leaves             | citronellal, isomenthone, citronellol, geraniol, limonene, etc.                                                                                            | [7]       |
| Clove bud 1              | <i>Eugenia caryophyllata</i>   | bud                | eugenol, eugenyl acetate, $\beta$ -caryophyllene, carvacrol, cinnamaldehyde, thymol, etc.                                                                  | [8]       |
| Clove bud 2              | <i>Syzygium aromaticum L</i>   | bud                | eugenol, $\beta$ -caryophyllene, eugenyl acetate, etc.                                                                                                     | [9]       |
| Geranium bourbon         | <i>Pelargonium graveolens</i>  | leaves and flowers | linalool, citronellol, iso-menthone, geraniol, citronellyl formate, geraniol formate, etc.                                                                 | [10]      |
| Allspice                 | <i>Pimenta officinalis</i>     | berries            | eugenol, methyleugenol, $\beta$ -caryophyllene, $\alpha$ -humulene, etc.                                                                                   | [11]      |
| Vetiver                  | <i>Vetiveria zizanioides</i>   | root               | cycloisolongifolene, khusimene, $\beta$ -cadinene, $\beta$ -guaiene, $\beta$ -vetivenene, etc.                                                             | [12]      |
| Cinnamon leaf            | <i>Cinnamomum zeylanicum</i>   | leaf               | eugenol, benzyl benzoate, linalool, cinnamaldehyde, etc.                                                                                                   | [13]      |
| Geranium                 | <i>Pelargonium asperum</i>     | herbs              | citronellol, citronellyl ester, geraniol, buthyl anthranilate, etc.                                                                                        | [14]      |
| Bergamot                 | <i>Citrus bergamia</i>         | fruit peel         | limonene, $\beta$ -pinene, $\gamma$ -terpinene, linalool, linalyl acetate, etc.                                                                            | [15]      |
| Cajeput                  | <i>Melaleuca cajeputi</i>      | leaves and buds    | ethanone, 4H-1-benzopyran-4-one, 1,4-naphthalenedione, naphthalene, etc.                                                                                   | [16]      |

|                  |                               |                    |                                                                                                                                    |      |
|------------------|-------------------------------|--------------------|------------------------------------------------------------------------------------------------------------------------------------|------|
| Marjoram (sweet) | <i>Origanum majorana</i>      | leaves and flowers | $\alpha$ -terpineol, (-)-Terpinen-4-ol, 5-Isopropyl-2-methylbicyclo[3.1.0]hexan-2-ol, $\beta$ -cymene, $\beta$ -phellandrene, etc. | [17] |
| Fir needle       | <i>Abies siberica</i>         | needles            | $\alpha$ -pinene, camphene, $\beta$ -pinene, $\Delta^3$ -carene, limonene, bornyl acetate, etc.                                    | [18] |
| Grapefruit       | <i>Citrus paradisi</i>        | peel               | limonene, $\beta$ -myrcene, $\alpha$ -pinene, etc.                                                                                 | [19] |
| Spearmint        | <i>Mentha spicata</i>         | flowering herbs    | carvone, limonene, 1,8-cineole, $\beta$ -caryophyllene, germacrene D, etc.                                                         | [20] |
| Tangerine        | <i>Citrus reticulata</i>      | fruit peel         | citronellal, thymol, geranyl acetate, $\beta$ -elemen, germacrene B, etc.                                                          | [21] |
| Tea tree         | <i>Melaleuca alternifolia</i> | leaves             | $\alpha$ -pinene, $\alpha$ -terpinene, 1,8-cineole, $\gamma$ -terpinene, terpinolene, terpinen-4-ol, $\alpha$ -terpineol, etc.     | [22] |
| Lemon            | <i>Citrus limonum</i>         | peel               | $\beta$ -pinene, limonene, linalool, $\alpha$ -terpineol, linalyl acetate, nerolidol, farnesol, etc.                               | [23] |
| Ho wood          | <i>Cinnamomum camphora</i>    | twigs and bark     | D-camphor, 1,8-cineole, $\alpha$ -terpineol, while D-camphor, linalool, 1,8-cineole, etc.                                          | [24] |
| Frankincense     | <i>Boswellia serrata</i>      | resin              | $\alpha$ -pinene, $\alpha$ -thujene, methylchavicol, sabinene, methyleugenol, myrcene, limonene, p-cymene, etc.                    | [25] |

## References

- Falleh, H.; Ben Jemaa, M.; Djebali, K.; Abid, S.; Saada, M.; Ksouri, R. Application of the mixture design for optimum antimicrobial activity: Combined treatment of *Syzygium aromaticum*, *Cinnamomum zeylanicum*, *Myrtus communis*, and *Lavandula stoechas* essential oils against *Escherichia coli*. *J. Food. Process. Preserv.* **2019**, 00: e14257.
- Vinciguerra, V.; Rojas, F.; Tedesco, V.; Giusiano, G.; Angiolella, L. Chemical characterization and antifungal activity of *Origanum vulgare*, *Thymus vulgaris* essential oils and carvacrol against *Malassezia furfur*. *Nat. Prod. Res.* **2019**, 33, 3273-3277.
- Nikolic, M.; Smiljkovic, M.; Markovic, T.; Cirica, A.; Glamoclija, J.; Markovic, D.; Sokovic, M. Sensitivity of clinical isolates of *Candida* to essential oils from Burseraceae family. *EXCLI J.* **2016**, 15, 280-289.
- Santos, J.D.C.; Coelho, E.; Silva, R.; Passos, C.P.; Teixeira, P.; Henriques, I.; Coimbra, M.A. Chemical composition and antimicrobial activity of *Satureja montana* byproducts essential oils. *Industrial Crops and Products.* **2019**, 137, 541-548.
- Dhayabaran, D.; Florance, E.J.; Nandakumar, K.; Shanmugarathinam, A.; Puratchikody, A. Anticonvulsant activity of fraction isolated from ethanolic extract of heartwood of *Cedrus deodara*. *J. Nat. Med.* **2014**, 68, 310-315.
- Compositions of essential oils Available online: [https://www.theplantguru.com/amfile/file/download/file\\_id/28/product\\_id/734/](https://www.theplantguru.com/amfile/file/download/file_id/28/product_id/734/) (accessed on 8 November 2019)
- Compositions of essential oils Available online: [https://www.theplantguru.com/amfile/file/download/file\\_id/9/product\\_id/714/](https://www.theplantguru.com/amfile/file/download/file_id/9/product_id/714/) (accessed on 8 November 2019)
- Chaieb, K.; Hajlaoui, H.; Zmantar, T.; Kahla-Nakbi, A.B.; Rouabhia, M.; Mahdouani, K.; Bakhrouf, A. The chemical composition and biological activity of clove essential oil, *Eugenia caryophyllata* (*Syzygium aromaticum* L. Myrtaceae): a short review. *Phytother. Res.* **2007**, 21, 501-506.

9. Compositions of essential oils Available online: [https://www.theplantguru.com/amfile/file/download/file\\_id/11/product\\_id/726/](https://www.theplantguru.com/amfile/file/download/file_id/11/product_id/726/) (accessed on 8 November 2019)
10. Essid, R.; Hammami, M.; Gharbi, D.; Karkouch, I.; Hamouda, T.B.; Elkahoui, S.; Limam, F.; Tabbene, O. Antifungal mechanism of the combination of *Cinnamomum verum* and *Pelargonium graveolens* essential oils with fluconazole against pathogenic *Candida* strains. *Appl. Microbiol. Biotechnol.* **2017**, *101*, 6993-7006.
11. Compositions of essential oils Available online: [https://www.theplantguru.com/amfile/file/download/file\\_id/1/product\\_id/622/](https://www.theplantguru.com/amfile/file/download/file_id/1/product_id/622/) (accessed on 8 November 2019)
12. David, A.; Wang, F.; Sun, X.; Li, H.; Lin, J.; Li, P.; Deng, G. Chemical Composition, Antioxidant, and Antimicrobial Activities of *Vetiveria zizanioides* (L.) Nash Essential Oil Extracted by Carbon Dioxide Expanded Ethanol. *Molecules.* **2019**, *24*.
13. Dongmo, P.M.J.; Tatsadjieu, L.N.; Tchoumboungang, F.; Sameza, M.L.; Dongmo, B.N.; Zollo, P.H.A.; Menut, C. Chemical Composition, Antiradical and Antifungal Activities of Essential Oil of the Leaves of *Cinnamomum Zeylanicum* Blume from Cameroon. *Natural Product Communications.* **2007**, *2*.
14. Ouedrhiri, W.; Balouiri, M.; Bouhdid, S.; Harki, E.H.; Moja, S.; Greche, H. Antioxidant and antibacterial activities of *Pelargonium asperum* and *Ormenis mixta* essential oils and their synergistic antibacterial effect. *Environ. Sci. Pollut. Res. Int.* **2018**, *25*, 29860-29867.
15. Al-Abd, N.M.; Mohamed Nor, Z.; Mansor, M.; Azhar, F.; Hasan, M.S.; Kassim, M. Antioxidant, antibacterial activity, and phytochemical characterization of *Melaleuca cajuputi* extract. *BMC. Complement. Altern. Med.* **2015**, *15*, 385.
16. Compositions of essential oils Available online: [https://www.theplantguru.com/amfile/file/download/file\\_id/5/product\\_id/646/](https://www.theplantguru.com/amfile/file/download/file_id/5/product_id/646/) (accessed on 8 November 2019)
17. Makrane, H.; Aziz, M.; Berrabah, M.; Mekhfi, H.; Ziyat, A.; Bnouham, M.; Legssyer, A.; Elombo, F.K.; Gressier, B.; Eto, B. Myorelaxant Activity of essential oil from *Origanum majorana* L. on rat and rabbit. *J. Ethnopharmacol.* **2019**, *228*, 40-49.
18. Ou, M.C.; Liu, Y.H.; Sun, Y.W.; Chan, C.F. The Composition, Antioxidant and Antibacterial Activities of Cold-Pressed and Distilled Essential Oils of *Citrus paradisi* and *Citrus grandis* (L.) Osbeck. *Evid. Based. Complement. Alternat. Med.* **2015**, *2015*, 804091.
19. Compositions of essential oils Available online: [https://www.theplantguru.com/amfile/file/download/file\\_id/15/product\\_id/810/](https://www.theplantguru.com/amfile/file/download/file_id/15/product_id/810/) (accessed on 8 November 2019)
20. Bardaweel, S.K.; Bakchiche, B.; Ha, A.L.; Rezzoug, M.; Gherib, A.; Flamini, G. Chemical composition, antioxidant, antimicrobial and Antiproliferative activities of essential oil of *Mentha spicata* L. (Lamiaceae) from Algerian Saharan atlas. *BMC. Complement. Altern. Med.* **2018**, *18*, 201.
21. Duan, L.; Guo, L.; Dou, L.L.; Zhou, C.L.; Xu, F.G.; Zheng, G.D.; Li, P.; Liu, E.H. Discrimination of *Citrus reticulata* Blanco and *Citrus reticulata* 'Chachi' by gas chromatograph-mass spectrometry based metabolomics approach. *Food. Chem.* **2016**, *212*, 123-127.
22. Ben Hsouna, A.; Ben Halima, N.; Smaoui, S.; Hamdi, N. Citrus lemon essential oil: chemical composition, antioxidant and antimicrobial activities with its preservative effect against *Listeria monocytogenes* inoculated in minced beef meat. *Lipids. Health. Dis.* **2017**, *16*, 146.
23. Compositions of essential oils Available online: [https://www.theplantguru.com/amfile/file/download/file\\_id/26/product\\_id/998/](https://www.theplantguru.com/amfile/file/download/file_id/26/product_id/998/) (accessed on 8 November 2019)
24. Guo, S.; Geng, Z.; Zhang, W.; Liang, J.; Wang, C.; Deng, Z.; Du, S. The Chemical Composition of Essential Oils from *Cinnamomum camphora* and Their Insecticidal Activity against the Stored Product Pests. *Int. J. Mol. Sci.* **2016**, *17*.
25. Al-Yasiry, A.R.; Kiczorowska, B. Frankincense--therapeutic properties. *Postepy. Hig. Med. Dosw (Online).* **2016**, *70*, 380-391.
